# Supplementary material for: Characterization of the basic helix–loop–helix gene family and its tissue-differential expression in response to salt stress in poplar
Source: PeerJ. 2018 Mar 14;6:e4502. doi: 10.7717/peerj.4502 (PMC5857177; doi:10.7717/peerj.4502)
Supplement: Supplemental Information 1 [file peerj-06-4502-s001.xlsx]

## Sheet: Leaf-Root pair
id	baseMean	leaf(C)_baseMean	root(C)_baseMean	foldChange	pval	padj	Regulation
Potri.012G104900.1	115.533	228.8	2.26618	0.00990466	1.24954e-22	9.76914e-22	down
Potri.001G141100.1	44.982	89.0488	0.915269	0.0102783	4.97101e-11	2.75811e-10	down
Potri.007G023600.1	298.69	589.187	8.19344	0.0139064	1.6084e-32	1.62732e-31	down
Potri.005G121900.1	49.7322	97.6631	1.80122	0.0184432	1.85019e-10	9.35977e-10	down
Potri.009G117300.1	275.483	539.807	11.1592	0.0206725	5.59792e-63	9.62842e-62	down
Potri.014G066500.1	536.98	1048.61	25.3532	0.0241779	6.46449e-52	8.55302e-51	down
Potri.014G106300.1	36.8484	71.8368	1.85986	0.0258901	1.00985e-08	4.45371e-08	down
Potri.012G055700.1	15.5004	30.0709	0.92993	0.0309246	1.74799e-05	5.89517e-05	down
Potri.017G081300.1	11.8378	22.7456	0.92993	0.040884	0.000268127	0.000809085	down
Potri.016G051100.1	210.546	404.211	16.8812	0.0417633	6.6587e-34	7.63531e-33	down
Potri.017G115300.1	151.738	290.286	13.1908	0.0454406	7.74909e-18	5.55352e-17	down
Potri.004G156000.1	10.2202	19.5398	0.900608	0.046091	0.000919724	0.00263654	down
Potri.018G141700.1	33.6299	64.0636	3.19611	0.0498896	5.15034e-07	1.96857e-06	down
Potri.003G207200.1	548.004	1039.05	56.9624	0.0548218	1.47755e-159	8.4713e-158	down
Potri.010G186700.1	79.951	149.834	10.068	0.0671941	2.21594e-09	1.03011e-08	down
Potri.002G143300.1	388.539	720.768	56.311	0.0781265	3.62279e-71	8.90171e-70	down
Potri.014G103700.1	43.4753	80.5584	6.39222	0.0793489	2.59628e-06	9.30333e-06	down
Potri.005G001800.1	123.591	228.354	18.829	0.0824553	2.52765e-07	1.03513e-06	down
Potri.014G111400.1	272.508	495.693	49.3219	0.0995008	5.60727e-33	6.02782e-32	down
Potri.019G089000.1	371.483	668.991	73.9755	0.110578	2.48045e-53	3.87853e-52	down
Potri.006G202100.1	86.2235	151.249	21.1978	0.140151	1.24234e-06	4.64527e-06	down
Potri.008G070800.1	54.8837	95.9798	13.7877	0.143652	5.51719e-05	0.000182492	down
Potri.012G106000.1	350.36	581.823	118.897	0.204352	8.08948e-29	7.3231e-28	down
Potri.004G031800.1	32.3627	53.3359	11.3895	0.213544	0.00285626	0.0074436	down
Potri.004G168100.1	89.7256	131.495	47.9563	0.364701	0.00715222	0.0176737	down
Potri.015G105200.1	222.835	307.264	138.407	0.450449	9.41805e-05	0.000305642	down
Potri.002G055400.1	260.58	521.16	0	0	2.29245e-64	4.38112e-63	down
Potri.005G207200.1	216.969	433.939	0	0	6.58185e-53	9.43398e-52	down
Potri.001G314400.1	112.242	224.483	0	0	1.28343e-26	1.10375e-25	down
Potri.003G093200.1	104.281	208.563	0	0	7.90372e-24	6.47352e-23	down
Potri.017G054500.1	49.2705	98.5411	0	0	1.66789e-13	1.06251e-12	down
Potri.015G104200.1	29.6855	59.3711	0	0	1.42529e-10	7.42881e-10	down
Potri.002G252800.1	4.7819	9.5638	0	0	0.00671364	0.0169815	down
Potri.012G079100.1	4.79084	9.58168	0	0	0.00719278	0.0176737	down
Potri.018G083700.1	593.696	395.004	792.388	2.00602	1.89299e-18	1.41562e-17	up
Potri.001G142200.1	2254.81	1342.1	3167.52	2.36012	0	0	up
Potri.005G146500.1	87.052	46.2261	127.878	2.76636	0.00809528	0.0196111	up
Potri.002G114700.1	125.636	66.6964	184.576	2.76741	0.00103682	0.00287633	up
Potri.002G235400.1	202.326	96.1764	308.475	3.20739	2.22512e-07	9.33465e-07	up
Potri.003G092200.1	1125.93	497.34	1754.53	3.52783	1.05716e-66	2.2729e-65	up
Potri.005G230800.1	38.8278	17.0321	60.6235	3.55936	0.00981219	0.0231191	up
Potri.002G124400.1	20.2586	8.4535	32.0637	3.79296	0.0203093	0.0447846	up
Potri.006G074600.1	18.4865	7.30744	29.6656	4.05964	0.0193844	0.0433003	up
Potri.014G025800.1	25.3415	9.34932	41.3337	4.42104	0.0131409	0.0305438	up
Potri.004G029100.1	43.3165	15.8682	70.7647	4.45954	0.00241841	0.00639947	up
Potri.019G112000.1	24.3338	7.91622	40.7515	5.14785	0.003291	0.00844855	up
Potri.006G074900.1	63.246	18.9846	107.507	5.66287	0.000154065	0.0004732	up
Potri.001G410600.1	63.954	19.0204	108.888	5.72479	0.000131882	0.000420069	up
Potri.013G126800.1	27.9509	7.91622	47.9856	6.06169	0.000996514	0.00280984	up
Potri.004G055700.1	130.782	35.7486	225.816	6.31677	1.74816e-06	6.39752e-06	up
Potri.018G109500.1	718.512	151.642	1285.38	8.47639	7.0721e-180	6.082e-178	up
Potri.009G081400.1	61.3322	11.6236	111.041	9.55308	3.26885e-06	1.14743e-05	up
Potri.002G176900.1	311.182	46.9779	575.386	12.248	6.84754e-46	8.41269e-45	up
Potri.006G186600.1	427.405	60.1597	794.65	13.209	1.47579e-83	4.23059e-82	up
Potri.007G020200.1	79.3898	10.5311	148.248	14.0772	6.23404e-09	2.82172e-08	up
Potri.002G108400.1	228.386	26.2921	430.48	16.373	6.91795e-32	6.61048e-31	up
Potri.005G039800.1	9.72502	1.05669	18.3933	17.4066	0.00241359	0.00639947	up
Potri.013G129800.1	6.46343	0.519407	12.4074	23.8877	0.00906505	0.0216554	up
Potri.015G134300.1	64.7921	4.79978	124.784	25.998	8.51417e-10	4.18411e-09	up
Potri.002G248500.1	482.874	22.3155	943.433	42.2769	3.60848e-155	1.55165e-153	up
Potri.010G098900.1	153.281	6.91315	299.649	43.3448	2.37837e-15	1.63632e-14	up
Potri.006G037600.1	11.7006	0.519407	22.8817	44.0536	0.000149974	0.00046901	up
Potri.010G077000.1	43.7764	1.57609	85.9766	54.5505	1.26086e-09	6.02412e-09	up
Potri.001G287200.1	20.1574	0.53728	39.7775	74.035	4.36738e-07	1.70725e-06	up
Potri.012G132100.1	54.9873	0.519407	109.455	210.731	1.27067e-12	7.53641e-12	up
Potri.007G009400.1	68.4635	0.53728	136.39	253.852	8.0345e-15	5.31513e-14	up
Potri.T155900.1	326.638	0	653.276	Inf	4.12446e-88	1.41882e-86	up
Potri.012G132000.1	52.6206	0	105.241	Inf	2.3259e-13	1.42877e-12	up
Potri.007G097600.1	45.0074	0	90.0147	Inf	2.75503e-12	1.57955e-11	up
Potri.005G095400.1	33.1822	0	66.3643	Inf	1.2786e-10	6.87249e-10	up
Potri.005G071100.1	50.9912	0	101.982	Inf	2.42962e-08	1.04474e-07	up
Potri.017G126800.1	17.4268	0	34.8535	Inf	2.90322e-07	1.16129e-06	up
Potri.001G113400.1	13.9762	0	27.9524	Inf	3.66401e-06	1.26042e-05	up

## Sheet: Leaf-Stem pair
id	baseMean	leaf(C)_baseMean	stem(C)_baseMean	foldChange	pval	padj	Regulation
Potri.017G054500.1	47.4143	94.388	0.440715	0.00466918	1.48054e-11	3.46869e-10	down
Potri.001G314400.1	108.923	213.65	4.19577	0.0196385	1.16916e-18	9.58712e-17	down
Potri.006G202100.1	74.2732	143.469	5.0772	0.0353888	8.04614e-12	2.63913e-10	down
Potri.014G111400.1	247.379	471.135	23.6231	0.0501409	4.98024e-24	8.1676e-22	down
Potri.005G121900.1	49.4752	93.0885	5.86193	0.0629716	3.68709e-07	3.77927e-06	down
Potri.003G093200.1	108.023	200.066	15.9804	0.0798757	5.82155e-07	5.30408e-06	down
Potri.007G023600.1	316.982	564.23	69.7338	0.123591	7.25759e-09	8.50175e-08	down
Potri.002G055400.1	281.994	493.705	70.2823	0.142357	1.20378e-14	4.9355e-13	down
Potri.005G207200.1	240.136	410.872	69.4009	0.168911	1.00987e-11	2.76031e-10	down
Potri.016G051100.1	229.619	385.713	73.5248	0.190621	5.90613e-10	8.8055e-09	down
Potri.014G066500.1	596.109	993.528	198.689	0.199984	5.91991e-15	3.23622e-13	down
Potri.012G104900.1	132.716	217.523	47.9095	0.22025	1.79024e-06	1.468e-05	down
Potri.003G207200.1	642.052	988.686	295.419	0.298799	8.21962e-10	1.12335e-08	down
Potri.009G117300.1	344.468	515.155	173.78	0.337335	1.36319e-06	1.17664e-05	down
Potri.019G089000.1	429.441	637.315	221.568	0.347659	5.07619e-07	4.89703e-06	down
Potri.004G168100.1	87.2152	125.217	49.2136	0.393028	0.0109873	0.0429029	down
Potri.002G143300.1	491.566	685.185	297.948	0.434844	4.22408e-05	0.000288646	down
Potri.016G068500.1	10.2784	20.5569	0	0	0.00230434	0.0114818	down
Potri.002G235400.1	141.846	91.4191	192.272	2.10319	0.0123893	0.0461783	up
Potri.018G141800.1	210.19	133.358	287.023	2.15228	0.00271493	0.0127214	up
Potri.005G158100.1	895.167	564.914	1225.42	2.16922	3.17099e-05	0.000226105	up
Potri.018G083700.1	649.5	376.167	922.833	2.45325	0.00061635	0.00348557	up
Potri.006G135600.1	122.888	67.3597	178.416	2.64871	0.0023853	0.0115055	up
Potri.010G186700.1	262.23	141.682	382.778	2.70167	0.00430826	0.0190961	up
Potri.002G114700.1	133.305	63.1043	203.505	3.22491	0.000775586	0.00423987	up
Potri.003G092200.1	1040.76	471.168	1610.36	3.4178	2.09157e-11	3.81131e-10	up
Potri.012G055700.1	65.9912	28.7141	103.268	3.59643	0.00231036	0.0114818	up
Potri.006G186600.1	136.955	57.3988	216.511	3.77205	1.45691e-05	0.000108606	up
Potri.006G074700.1	60.0586	24.1477	95.9695	3.97426	0.00177338	0.00938175	up
Potri.018G109500.1	363.355	142.821	583.89	4.08826	9.70874e-10	1.22479e-08	up
Potri.002G108400.1	67.5952	25.3294	109.861	4.33729	0.000410815	0.00249532	up
Potri.002G248500.1	59.3542	20.8973	97.8111	4.68056	0.000566943	0.00332066	up
Potri.019G112000.1	28.8324	7.55169	50.113	6.636	0.00320488	0.0146	up
Potri.009G081400.1	44.9967	11.0542	78.9391	7.14109	0.000193356	0.00121963	up
Potri.013G117600.1	18.4556	3.50252	33.4087	9.53847	0.00708748	0.0298038	up
Potri.005G230800.1	108.6	15.8727	201.327	12.6839	1.84708e-11	3.78652e-10	up
Potri.002G032400.1	354.512	43.3003	665.724	15.3746	1.66857e-10	2.73645e-09	up
Potri.001G063000.1	31.5994	2.49759	60.7013	24.3039	6.33969e-05	0.000415884	up
Potri.013G129800.1	9.4922	0.517193	18.4672	35.7066	0.0122899	0.0461783	up
Potri.007G009400.1	9.54379	0.487736	18.5998	38.1351	0.0127863	0.0465989	up
Potri.005G039800.1	59.0395	1.00493	117.074	116.5	1.20316e-07	1.31545e-06	up
Potri.005G071100.1	19.8826	0	39.7652	Inf	8.494e-06	6.63341e-05	up

## Sheet: Root-Stem pair
id	baseMean	root(C)_baseMean	stem(C)_baseMean	foldChange	pval	padj	Regulation
Potri.T155900.1	353.542	701.498	5.58627	0.00796334	1.40374e-52	2.45654e-50	down
Potri.012G132000.1	56.9284	112.926	0.931045	0.00824476	1.5205e-10	2.95653e-09	down
Potri.012G132100.1	59.454	117.512	1.39657	0.0118845	2.14389e-10	3.7518e-09	down
Potri.010G098900.1	164.544	322.101	6.98821	0.0216957	2.27013e-14	1.32424e-12	down
Potri.007G020200.1	82.2956	159.376	5.21493	0.0327209	1.16511e-10	2.54867e-09	down
Potri.007G097600.1	50.9058	96.5026	5.30911	0.0550152	3.45854e-06	2.52185e-05	down
Potri.004G055700.1	130.095	242.767	17.4234	0.0717703	8.9275e-09	1.11594e-07	down
Potri.005G095400.1	38.171	71.2212	5.12075	0.0718992	0.000224023	0.001089	down
Potri.010G077000.1	49.4644	92.2232	6.70567	0.0727114	2.2435e-05	0.000130871	down
Potri.002G248500.1	556.4	1011.96	100.838	0.0996461	9.90974e-32	8.67102e-30	down
Potri.001G410600.1	65.8682	116.829	14.9075	0.127601	4.35691e-05	0.000238268	down
Potri.007G009400.1	82.7395	146.371	19.1079	0.130544	4.2001e-06	2.94007e-05	down
Potri.015G134300.1	78.3759	134.113	22.6384	0.1688	9.50542e-05	0.000504075	down
Potri.002G054100.1	88.4529	148.31	28.596	0.192812	0.00012358	0.000636072	down
Potri.002G176900.1	369.043	617.546	120.541	0.195193	3.09783e-13	1.08424e-11	down
Potri.002G108400.1	287.587	461.85	113.324	0.245369	4.36394e-09	5.87454e-08	down
Potri.006G186600.1	538.139	852.267	224.01	0.26284	8.82491e-13	2.57393e-11	down
Potri.006G074900.1	73.2852	115.343	31.2276	0.270738	0.00303303	0.0117951	down
Potri.018G109500.1	990.105	1378.97	601.236	0.436003	1.3413e-08	1.56485e-07	down
Potri.017G126800.1	18.7254	37.4507	0	0	0.000170448	0.000852238	down
Potri.001G113400.1	15.0102	30.0205	0	0	0.00100383	0.00408537	down
Potri.012G106000.1	223.078	127.531	318.624	2.49841	0.000417895	0.00197653	up
Potri.019G089000.1	153.357	79.276	227.438	2.86894	0.00136385	0.00542441	up
Potri.005G230800.1	136.042	64.8939	207.19	3.19274	0.000495882	0.00228367	up
Potri.018G141800.1	194.138	91.7518	296.524	3.23181	2.32443e-05	0.000131218	up
Potri.015G142700.1	176.288	79.276	273.299	3.44744	2.07592e-05	0.000125271	up
Potri.016G051100.1	47.1043	18.081	76.1277	4.21036	0.00997301	0.0379408	up
Potri.003G207200.1	182.451	60.9652	303.937	4.98543	7.21823e-08	6.31595e-07	up
Potri.002G143300.1	183.54	60.4427	306.636	5.07318	4.27325e-08	4.27174e-07	up
Potri.005G039800.1	69.8849	19.7969	119.973	6.06017	0.00083488	0.00364176	up
Potri.014G066500.1	116.176	27.3293	205.023	7.50196	7.00913e-08	6.31595e-07	up
Potri.007G023600.1	40.5779	8.76305	72.3927	8.26114	0.000853212	0.00364176	up
Potri.005G001800.1	97.2219	20.2497	174.194	8.6023	2.11609e-07	1.76341e-06	up
Potri.002G032400.1	369.893	55.9079	683.879	12.2322	7.3679e-12	1.84197e-10	up
Potri.009G117300.1	95.4292	12.0927	178.766	14.783	8.28126e-10	1.20768e-08	up
Potri.018G141700.1	28.2795	3.42488	53.1341	15.5142	0.000933248	0.00388853	up
Potri.012G104900.1	25.9055	2.41715	49.3938	20.4347	0.000701679	0.00314856	up
Potri.008G070800.1	198.477	14.8349	382.118	25.758	1.12586e-05	7.29727e-05	up
Potri.010G186700.1	201.893	10.804	392.981	36.3736	2.19317e-13	9.5951e-12	up
Potri.017G115300.1	469.906	14.1012	925.71	65.6475	7.14503e-07	5.43644e-06	up
Potri.012G055700.1	53.6299	1.00772	106.252	105.438	4.77825e-10	7.60176e-09	up
Potri.002G055400.1	36.1627	0	72.3254	Inf	3.49243e-08	3.81984e-07	up
Potri.005G207200.1	35.6972	0	71.3944	Inf	4.39379e-08	4.27174e-07	up
Potri.001G063000.1	31.0891	0	62.1781	Inf	4.32816e-07	3.44285e-06	up
Potri.015G104200.1	9.4571	0	18.9142	Inf	0.0128989	0.0480278	up
