# Supplementary material for: Characterization of the basic helix–loop–helix gene family and its tissue-differential expression in response to salt stress in poplar
Source: PeerJ. 2018 Mar 14;6:e4502. doi: 10.7717/peerj.4502 (PMC5857177; doi:10.7717/peerj.4502)
Supplement: Supplemental Information 2 [file peerj-06-4502-s002.xlsx]

## Sheet: Leaf
id	baseMean	leaf(C)_baseMean	leaf(T)_baseMean	foldChange	pval	padj	Regulation
Potri.005G121900.1	45.4101	89.2231	1.59708	0.0178998	3.57908e-14	9.24595e-13	down
Potri.017G081300.1	10.5843	20.6578	0.510834	0.0247283	0.000102445	0.000661623	down
Potri.007G023600.1	280.652	540.993	20.31	0.037542	2.30548e-14	7.67266e-13	down
Potri.009G117300.1	267.267	493.81	40.7226	0.0824661	1.04961e-26	8.13446e-25	down
Potri.014G103700.1	39.5359	72.748	6.32374	0.0869267	3.14338e-08	4.0602e-07	down
Potri.003G093200.1	105.537	191.851	19.2237	0.100201	7.05941e-07	7.81577e-06	down
Potri.012G104900.1	123.736	208.45	39.0229	0.187205	5.05512e-10	9.7943e-09	down
Potri.017G115300.1	158.721	266.787	50.6545	0.189869	5.14273e-06	4.42846e-05	down
Potri.005G207200.1	246.869	393.611	100.126	0.254378	2.47505e-14	7.67266e-13	down
Potri.008G070800.1	56.0483	87.9525	24.1441	0.274513	0.000251886	0.00150163	down
Potri.016G051100.1	247.639	369.728	125.55	0.339574	9.15508e-10	1.57671e-08	down
Potri.001G142200.1	821.893	1222.87	420.92	0.344207	1.07983e-33	1.67374e-31	down
Potri.004G168100.1	85.0277	120.009	50.0468	0.417027	0.00324291	0.016755	down
Potri.014G111400.1	324.386	451.474	197.299	0.43701	1.09354e-08	1.5409e-07	down
Potri.001G141100.1	40.9017	81.8035	0	0	8.06884e-15	4.1689e-13	down
Potri.012G055700.1	13.7628	27.5256	0	0	5.62293e-07	6.70427e-06	down
Potri.013G025900.1	9.64617	19.2923	0	0	3.67146e-05	0.000258671	down
Potri.004G156000.1	8.91599	17.832	0	0	7.7695e-05	0.000523597	down
Potri.005G208600.1	455.303	295.339	615.267	2.08326	3.36767e-06	3.26243e-05	up
Potri.010G186700.1	228.885	135.716	322.053	2.37299	2.14939e-06	2.22104e-05	up
Potri.018G109500.1	274.079	136.765	411.392	3.00802	3.02743e-11	6.7036e-10	up
Potri.014G106300.1	134.482	65.5181	203.446	3.10519	4.27902e-06	3.90146e-05	up
Potri.002G054100.1	159.228	67.033	251.423	3.75073	9.78325e-09	1.5164e-07	up
Potri.009G081400.1	25.3865	10.5934	40.1795	3.79288	0.0034719	0.016817	up
Potri.002G248500.1	48.086	20.0024	76.1697	3.80803	0.000301107	0.00172858	up
Potri.015G074500.1	49.634	8.16999	91.0981	11.1503	0.00339956	0.016817	up

## Sheet: Root
id	baseMean	root(C)_baseMean	root(T)_baseMean	foldChange	pval	padj	Regulation
Potri.010G098900.1	119.142	225.084	13.2004	0.0586464	1.08341e-08	1.19852e-07	down
Potri.007G097600.1	36.3943	67.278	5.51063	0.0819084	1.11336e-05	7.57941e-05	down
Potri.008G116000.1	21.8733	40.4104	3.3361	0.0825555	0.000909513	0.00435091	down
Potri.007G009400.1	56.5434	102.138	10.9492	0.107201	4.55607e-07	4.24434e-06	down
Potri.002G159400.1	84.804	151.478	18.1302	0.119689	4.18381e-09	4.9369e-08	down
Potri.002G143300.1	23.811	42.1834	5.4386	0.128928	0.0026002	0.0107031	down
Potri.005G230800.1	25.9263	45.1804	6.67221	0.147679	0.0030369	0.0122166	down
Potri.002G108400.1	186.332	322.196	50.4692	0.156641	2.6307e-14	5.1737e-13	down
Potri.002G054100.1	60.0081	103.484	16.5319	0.159753	8.36526e-06	6.16938e-05	down
Potri.005G071100.1	44.2202	75.8974	12.543	0.165262	0.00209594	0.0088329	down
Potri.002G114700.1	80.8576	137.935	23.7803	0.172403	5.19723e-07	4.59955e-06	down
Potri.010G130000.1	32.1533	54.5909	9.71564	0.177972	0.00196908	0.00850067	down
Potri.005G208600.1	111.845	184.963	38.7276	0.20938	2.56692e-07	2.67262e-06	down
Potri.007G020200.1	67.911	111.384	24.4377	0.2194	0.0003002	0.00161016	down
Potri.010G136100.1	121.292	191.39	51.194	0.267485	3.27365e-06	2.51929e-05	down
Potri.018G083700.1	378.238	593.111	163.365	0.275437	1.14301e-13	2.02313e-12	down
Potri.010G137600.1	66.5557	98.3052	34.8062	0.354062	0.0052205	0.0196602	down
Potri.011G031000.1	133.43	192.025	74.8348	0.389715	0.000414219	0.00215638	down
Potri.011G080000.1	81.7909	115.868	47.7138	0.411795	0.00825138	0.030427	down
Potri.005G221100.1	106.423	149.684	63.1607	0.42196	0.00370547	0.0145748	down
Potri.012G065000.1	253.156	353.751	152.56	0.431263	2.43332e-05	0.000153821	down
Potri.003G207200.1	21.2196	42.4391	0	0	2.56203e-06	2.06127e-05	down
Potri.014G066500.1	9.57242	19.1448	0	0	0.00891718	0.0321266	down
Potri.002G172100.1	609.737	395.986	823.489	2.07959	2.83401e-07	2.78678e-06	up
Potri.018G141800.1	123.27	64.1173	182.423	2.84514	0.00109862	0.00511725	up
Potri.019G089000.1	115.182	55.249	175.116	3.16958	3.81278e-05	0.000232711	up
Potri.008G161800.1	68.5457	27.6756	109.416	3.95351	0.000139567	0.000795052	up
Potri.001G410600.1	220.204	81.5062	358.902	4.40338	5.62337e-07	4.73969e-06	up
Potri.002G176900.1	1326.5	430.955	2222.05	5.15611	4.69018e-17	1.18595e-15	up
Potri.009G064700.1	254.715	82.004	427.425	5.21225	1.34277e-11	1.98059e-10	up
Potri.006G202100.1	54.2602	16.0012	92.5192	5.78202	2.24718e-05	0.000147315	up
Potri.007G023600.1	21.1018	6.09634	36.1072	5.92277	0.00907531	0.0321266	up
Potri.008G112000.1	33.2009	9.26044	57.1414	6.17048	0.000697611	0.00352792	up
Potri.010G077000.1	233.983	64.3253	403.64	6.27499	2.93258e-10	3.70762e-09	up
Potri.008G190800.1	19.4419	4.51429	34.3694	7.61347	0.00432671	0.0166484	up
Potri.004G088900.1	24.5226	5.10415	43.941	8.60887	0.000768386	0.0037779	up
Potri.015G142700.1	268.458	55.249	481.667	8.71812	1.72427e-25	7.62988e-24	up
Potri.016G068500.1	28.147	5.03255	51.2615	10.186	0.000143738	0.000795052	up
Potri.001G287200.1	172.289	29.7521	314.826	10.5817	1.68742e-20	4.9779e-19	up
Potri.018G141500.1	17.1204	2.41058	31.8302	13.2044	0.00135433	0.00614657	up
Potri.005G095400.1	404.997	49.6981	760.296	15.2983	7.87329e-16	1.74196e-14	up
Potri.006G148800.1	70.9819	7.5386	134.425	17.8316	8.83619e-13	1.42182e-11	up
Potri.013G129800.1	141.891	9.33545	274.447	29.3983	2.20517e-28	1.30105e-26	up
Potri.019G099300.1	131.171	2.41058	259.932	107.83	6.36837e-21	2.2544e-19	up
Potri.015G074500.1	268.079	3.4505	532.708	154.386	2.99791e-50	2.65315e-48	up
Potri.017G041000.1	37.7223	0.33073	75.1138	227.115	3.50376e-11	4.7705e-10	up
Potri.019G099500.1	334.157	2.45831	665.855	270.859	2.9825e-88	5.27903e-86	up

## Sheet: Stem
id	baseMean	stem(C)_baseMean	stem(T)_baseMean	foldChange	pval	padj	Regulation
Potri.002G248500.1	49.9497	93.7457	6.15369	0.0656423	4.49092e-06	0.000144396	down
Potri.012G055700.1	53.0184	98.6706	7.36632	0.0746557	4.54074e-06	0.000144396	down
Potri.005G039800.1	61.7709	111.164	12.3775	0.111344	7.14488e-05	0.00124655	down
Potri.008G070800.1	204.026	353.893	54.1604	0.153042	0.00131709	0.0139611	down
Potri.005G207200.1	38.4088	66.2941	10.5235	0.158739	0.00363367	0.0282441	down
Potri.007G023600.1	39.7168	67.5573	11.8764	0.175797	0.00372947	0.0282441	down
Potri.005G230800.1	133.54	192.429	74.6508	0.387939	0.00373035	0.0282441	down
Potri.018G083700.1	627.417	880.283	374.551	0.42549	6.98452e-05	0.00124655	down
Potri.010G186700.1	261.97	364.502	159.439	0.437417	0.00346529	0.0282441	down
Potri.013G025900.1	27.4696	54.9392	0	0	0.00154676	0.0153709	down
Potri.012G065000.1	615.76	402.323	829.197	2.06102	6.8421e-05	0.00124655	up
Potri.010G072900.1	324.407	193.918	454.895	2.34581	0.000164388	0.00237616	up
Potri.009G081400.1	138.139	75.2407	201.037	2.67191	0.00183367	0.0171502	up
Potri.005G158100.1	2240.12	1172.45	3307.79	2.82126	1.78469e-13	2.83765e-11	up
Potri.006G186600.1	400.95	208.663	593.237	2.84303	1.0835e-06	5.74254e-05	up
Potri.002G172100.1	809.2	413.58	1204.82	2.91315	2.11158e-08	1.6787e-06	up
Potri.008G165700.1	151.959	66.6312	237.287	3.5612	5.21295e-05	0.00124655	up
Potri.019G099500.1	30.8679	5.50078	56.235	10.2231	0.0010283	0.0116786	up
Potri.015G074500.1	39.6284	5.56296	73.6938	13.2472	7.83993e-05	0.00124655	up
