# Supplementary material for: Characterization of the basic helix–loop–helix gene family and its tissue-differential expression in response to salt stress in poplar
Source: PeerJ. 2018 Mar 14;6:e4502. doi: 10.7717/peerj.4502 (PMC5857177; doi:10.7717/peerj.4502)
Supplement: Supplemental Information 3 [file peerj-06-4502-s003.xlsx]

## Sheet: Data set
geneID	L1_count	L1_FPKM	S1_count	S1_FPKM	R1_count	R1_FPKM	L2_count	L2_FPKM	S2_count	S2_FPKM	R2_count	R2_FPKM	SL1_count	SL1_FPKM	SS1_count	SS1_FPKM	SR1_count	SR1_FPKM	SL2_count	SL2_FPKM	SS2_count	SS2_FPKM	SR2_count	SR2_FPKM
Potri.001G062900.1	0	0	0	0	0	0	0	0	0	0	1	0.22	1	0.2	0	0	6	1.55	0	0	0	0	0	0
Potri.001G063000.1	2	0.53	71.6	22.97	0	0	3	0.77	47.39	13.84	0	0	2	0.51	14.67	4.04	13	4.31	0	0	20	5.49	2	0.65
Potri.001G083500.1	0	0	1	0.1	0	0	0	0	2	0.19	0	0	0	0	0	0	1	0.11	0	0	0	0	2	0.21
Potri.001G103600.1	0	0	0	0	0	0	10.09	0.61	11.36	0.78	0	0	0	0	6.07	0.39	0	0	0	0	0	0	0	0
Potri.001G113400.1	0	0	0	0	33	6.65	0	0	0	0	28	5.54	0	0	0	0	5	1.17	0	0	0	0	10	2.29
Potri.001G141100.1	98	13.85	1	0.17	1	0.15	71	9.77	67	10.43	1	0.15	0	0	0	0	2	0.36	0	0	0	0	2	0.35
Potri.001G142200.1	1264	76.11	1691	124.44	3415	221.77	1276	75.26	2402.25	159.85	3508.19	224.4	471	26.74	1112	69.96	1606.57	122.8	332.34	20.13	1165.49	73.03	1726.18	129.72
Potri.001G185900.1	61.27	8.36	65.77	10.91	44.46	6.55	57.42	7.63	62.19	9.35	32.83	4.75	30.32	3.91	29.66	4.21	2.35	0.4	48.45	6.63	35.64	5.05	4.77	0.8
Potri.001G191800.1	34	3.11	3	0.33	33	3.26	24	2.15	5	0.5	26	2.53	18	1.55	1	0.1	42	4.86	17	1.56	1	0.1	44	5
Potri.001G270000.1	88.86	8.78	78.03	9.39	0.59	0.06	189.22	18.25	92	10.03	355	37.22	111.5	10.4	0	0	100.5	12.55	91.43	9.07	47.63	4.89	65.13	7.99
Potri.001G287200.1	0	0	13	2.02	41	5.66	1	0.12	13	1.83	46	6.24	1	0.12	38	5.06	218	35.13	0	0	37	4.91	238	37.61
Potri.001G294300.1	0	0	0	0	0	0	0	0	0	0	0	0	0	0	0	0	0	0	1	0.13	0	0	2	0.33
Potri.001G299300.1	0	0	0	0	0	0	0	0	3	0.57	9	1.64	0	0	0	0	0	0	0	0	0	0	0	0
Potri.001G305100.1	0	0	0	0	0	0	0	0	0	0	0	0	2	0.29	0	0	5	0.96	0	0	0	0	5	0.94
Potri.001G314400.1	216	21.57	2	0.24	0	0	209	20.38	7	0.77	0	0	232	21.87	0	0	0	0	220	22.06	0	0	0	0
Potri.001G410600.1	18	1.72	10	1.16	117	12.04	18	1.68	20	2.1	121	12.25	18	1.62	37	3.68	230	27.75	22	2.11	23	2.28	288	34.12
Potri.001G416600.1	677	112.9	526	106.37	641	115.46	719	116.51	503	92.29	653	115.47	797	125.74	716	124.07	329.82	69.08	738	123.19	664	114.68	244	50.06
Potri.001G461000.1	0	0	0	0	0	0	0	0	0	0	0	0	0	0	0	0	1	0.18	0	0	0	0	1	0.18
Potri.002G032400.1	46	4.32	716.54	82.02	54	5.47	40.16	3.68	606.95	62.89	60	5.98	63	5.58	590.52	57.83	17	2.02	81	7.64	516	50.34	0	0
Potri.002G042000.1	477	37.8	406	39.27	459	39.24	540	41.86	462	40.43	499.81	42.07	475	35.51	370	30.61	143	14.36	405	32.25	316	26.04	114	11.25
Potri.002G045400.1	302.93	43.31	314.49	54.62	317.9	49.08	342.74	47.7	422.81	66.58	296.95	45.04	552.37	74.66	538.93	80.17	161.9	29.14	438.67	62.85	546.95	81.08	161.94	28.58
Potri.002G054100.1	57.78	3.2	11.68	0.79	151.47	9.05	81.72	4.44	46.59	2.85	151.05	8.89	219.63	11.47	116	6.72	11.56	0.81	256.13	14.28	69.72	4.02	11.79	0.82
Potri.002G055400.1	451.28	30.42	70.7	5.82	0	0	533.94	35.24	70.37	5.24	0	0	290.74	18.48	70.46	4.96	0	0	372.53	25.25	50.34	3.53	0	0
Potri.002G100100.1	0	0	0	0	1.01	0.15	1	0.13	0	0	0	0	0	0	0	0	2	0.35	0	0	0	0	4	0.68
Potri.002G101900.1	1	0.13	7	1.1	12	1.68	3	0.38	8	1.14	18	2.48	0	0	3	0.4	3	0.49	1	0.13	9	1.21	1	0.16
Potri.002G105300.1	4	0.84	3	0.76	0	0	5	1.02	8	1.85	16	3.57	0	0	0	0	4	1.05	3	0.63	0	0	5	1.29
Potri.002G108400.1	32	3.86	101	14.81	460	59.85	18	2.12	122	16.21	481	61.53	11	1.25	76	9.54	44	6.69	8	0.97	43	5.38	30	4.48
Potri.002G114700.1	55.95	5.75	222.01	27.78	180.64	20.02	70.27	7.05	181.78	20.6	222.54	24.26	48.65	4.72	127.46	13.65	12.24	1.59	93.75	9.67	173.92	18.55	22	2.8
Potri.002G119200.1	0	0	0	0	3	0.37	0	0	0	0	3	0.37	0	0	0	0	3	0.43	0	0	0	0	4	0.57
Potri.002G124400.1	8	1.11	5	0.85	37	5.56	8	1.08	13	1.99	33	4.87	2	0.26	4	0.58	10	1.75	4	0.56	6	0.87	2	0.34
Potri.002G125000.1	0	0	0	0	0	0	0	0	0	0	0	0	1	0.16	0	0	0	0	0	0	0	0	0	0
Potri.002G143300.1	676	55.91	300	30.27	62.52	5.58	688	55.64	297.91	27.2	60	5.27	476	37.14	334	28.83	5	0.52	403.94	33.57	319	27.43	3	0.31
Potri.002G159400.1	113.62	6.76	97.2	7.07	207.94	13.35	184.68	10.77	174.99	11.51	235.06	14.86	121.66	6.83	43.76	2.72	20	1.51	92.29	5.53	129.19	8	6.99	0.52
Potri.002G172100.1	327	23.54	339	29.8	517	40.14	392	27.61	546	43.41	643	49.16	216	14.66	1070	80.42	622.71	56.84	211	15.27	1247	93.36	575.23	51.6
Potri.002G176900.1	47	3.83	59	5.86	638	56.02	42	3.34	188	16.9	619	53.5	66	5.07	29	2.46	1524	157.14	48	3.93	27	2.28	1693	171.5
Potri.002G180300.1	0	0	0	0	0	0	0	0	0	0	0	0	0	0	0	0	0	0	0	0	0	0	0	0
Potri.002G231700.1	192.9	23.41	103.48	15.28	205	26.85	157.02	18.58	122.53	16.39	179	23.05	119.44	13.69	81.79	10.34	97	14.85	119.67	14.57	76	9.57	84.61	12.71
Potri.002G235400.1	90	6.25	174	14.77	339	25.41	92	6.26	217	16.66	335	24.72	59	3.87	201	14.59	124	10.93	74	5.17	217	15.68	106	9.18
Potri.002G248500.1	14	0.98	92	7.87	986	74.48	28	1.92	106	8.2	1077	80.1	80	5.28	8	0.59	277	24.6	65	4.58	4	0.29	255	22.26
Potri.002G252800.1	6.3	0.4	2.96	0.23	0	0	12.21	0.76	0	0	0	0	5.86	0.35	0	0	0	0	0	0	0	0	0	0
Potri.003G051600.1	0	0	0	0	2.34	0.32	0	0	0	0	0	0	0	0	0	0	1.66	0.26	0	0	0	0	0	0
Potri.003G074400.1	10.82	2.25	20.31	5.11	50.79	11.42	27.21	5.49	15.92	3.64	31.95	7.05	42.5	8.38	9.73	2.1	35.73	9.3	19.91	4.14	49.94	10.74	42.37	10.79
Potri.003G092200.1	431	25.57	1395	101.15	1822	116.57	509	29.58	1895.75	124.28	2014.81	126.97	640	35.79	1027	63.66	1241.43	93.5	649.66	38.76	1224.51	75.6	1228.82	90.99
Potri.003G093200.1	235	33.21	1	0.17	0	0	161	22.15	35	5.45	0	0	27	3.61	14	2.06	6	1.07	10	1.42	10	1.47	3	0.52
Potri.003G128000.1	0	0	0	0	0	0	0	0	0	0	91.84	5.87	0	0	0	0	0	0	0	0	0	0	0	0
Potri.003G147300.1	0	0	0	0	1	0.09	0	0	0	0	9	0.83	0	0	0	0	5	0.55	0	0	0	0	3	0.32
Potri.003G164500.1	0	0	0	0	0	0	0	0	0	0	0	0	0	0	0	0	0	0	0	0	0	0	0	0
Potri.003G207200.1	995.06	89.69	301.21	33.11	46.02	4.48	971.99	85.62	290.89	28.94	78.55	7.52	812.55	69.12	191.33	17.99	0	0	838.01	75.87	229.03	21.45	0	0
Potri.004G029100.1	13.98	1.16	0	0	66.43	5.95	15.53	1.26	98.77	9.06	89.14	7.86	48.11	3.77	47.24	4.1	71.09	7.48	32.46	2.71	18.21	1.57	0	0
Potri.004G029800.1	0	0	0	0	0	0	0	0	0	0	0	0	0	0	0	0	0	0	0	0	0	0	0	0
Potri.004G031800.1	52	9.6	15.5	3.47	9	1.8	49	8.78	25	5.08	16.5	3.23	22	3.85	22.05	4.23	4	0.93	20.5	3.79	26	4.97	1.5	0.34
Potri.004G044400.1	2	0.53	6	1.91	0	0	3	0.77	3	0.87	0	0	0	0	3	0.82	0	0	4	1.05	0	0	0	0
Potri.004G055700.1	44	7.34	12	2.43	291	52.41	24	3.89	23	4.22	201	35.54	6	0.95	14	2.43	66	13.82	15	2.5	16	2.76	29	5.95
Potri.004G088900.1	0	0	0	0	6	0.82	0	0	1	0.14	9	1.2	0	0	0	0	34	5.4	2	0.25	0	0	30	4.68
Potri.004G099400.1	0	0	0	0	0	0	0	0	0	0	0	0	0	0	0	0	0	0	0	0	0	0	1.95	0.38
Potri.004G112900.1	162.68	20.64	185.96	28.7	103.65	14.2	205.94	25.47	145.1	20.29	113.33	15.26	187.41	22.47	126.76	16.75	12.56	2.01	97.25	12.37	141.21	18.59	32	5.02
Potri.004G128400.1	0	0	1	0.96	0	0	0	0	2	1.78	0	0	0	0	0	0	0	0	0	0	0	0	0	0
Potri.004G156000.1	19	1.65	5.43	0.58	0	0	17.74	1.51	5.56	0.53	1.93	0.18	0	0	0	0	5.39	0.59	0	0	0	0	6.51	0.7
Potri.004G168100.1	128	16.59	41	6.46	46	6.44	121.23	15.31	60	8.57	59	8.12	48	5.88	42	5.67	12	1.96	47	6.11	40	5.38	19	3.05
Potri.005G001800.1	269.85	14.03	169.42	10.77	24.67	1.38	164.25	8.37	170.8	9.81	16.05	0.89	411.77	20.17	77.89	4.23	41.83	2.76	355.36	18.58	304.28	16.46	30.6	1.99
Potri.005G039800.1	1	0.12	137	20.23	26	3.41	1	0.12	93	12.44	14	1.8	0	0	14	1.77	5	0.77	0	0	10	1.26	5	0.75
Potri.005G053500.1	28	3.57	41	6.35	56	7.7	18	2.23	60	8.42	75	10.13	47	5.65	53	7.03	22	3.53	55	7.02	50	6.61	34	5.35
Potri.005G060900.1	0	0	0	0	0	0	0	0	0	0	0	0	0	0	0	0	0	0	0	0	0	0	0	0
Potri.005G071100.1	0	0	47	7.74	76	11.12	0	0	31	4.63	148	21.27	1	0.13	54	7.61	7	1.19	0	0	31	4.36	11	1.84
Potri.005G095400.1	0	0	0	0	73	15.44	0	0	11	2.37	72	14.93	0	0	3	0.61	494	121.06	0	0	9	1.82	604	144.84
Potri.005G113400.1	11	1.47	29	4.71	25	3.6	8	1.04	26	3.82	25	3.54	14.5	1.83	15.5	2.15	28	4.71	18.5	2.48	0	0	22	3.63
Potri.005G121900.1	97	15.67	5	0.98	0	0	88	13.82	7	1.24	4	0.69	1	0.15	6	1.01	3	0.61	2	0.32	2	0.33	13	2.59
Potri.005G138900.1	0	0	0	0	5	0.9	0	0	0	0	0	0	0	0	0	0	0	0	0	0	0	0	0	0
Potri.005G139700.1	2	0.26	0	0	1	0.14	1	0.13	4	0.57	0	0	0	0	0	0	0	0	0	0	0	0	0	0
Potri.005G146500.1	58.55	5.88	53.47	6.54	152.68	16.54	28.75	2.82	69.92	7.75	126.43	13.48	68.08	6.45	47	4.92	52	6.6	15.04	1.52	49.77	5.19	29.1	3.63
Potri.005G158100.1	600	68.22	1205	166.8	646	79.28	522	57.9	1262	158.23	675	81.46	391	41.99	3148	372.97	263	37.76	433	49.4	3227	380.93	314	44.24
Potri.005G207200.1	370.75	31.09	70.83	7.25	0	0	449.4	36.85	68.1	6.3	0	0	94.56	7.48	21.43	1.88	0	0	94.66	7.97	0	0	0	0
Potri.005G208600.1	355.53	19.88	124.22	8.49	253.32	15.28	254.01	13.92	276.44	17.09	288.2	17.12	641.89	33.84	226.72	13.25	46.06	3.27	529.07	29.76	310.65	18.08	11.67	0.82
Potri.005G217800.1	226.07	32.33	179.51	31.18	214.1	33.05	232.26	32.33	253.19	39.87	225.05	34.13	123.63	16.71	105.07	15.63	61.1	11	100.33	14.38	114.05	16.91	60.06	10.6
Potri.005G221100.1	262.5	20.76	212.63	20.52	215.5	18.38	282	21.81	243.5	21.26	221.09	18.57	220.5	16.45	218	17.99	59	5.91	248.5	19.75	204.5	16.81	34.5	3.4
Potri.005G230800.1	8.76	0.95	202.56	26.62	50.48	5.88	23.39	2.46	201.22	23.95	82.79	9.48	18.84	1.92	72.83	8.19	7.57	1.03	12.77	1.38	71.04	7.96	2.29	0.31
Potri.006G037100.1	69	12.94	201	45.65	91	18.44	76	13.83	96	19.79	90	17.89	78	13.85	132	25.7	53	12.46	77	14.44	91	17.66	53	12.19
Potri.006G037200.1	1	0.18	1	0.21	2	0.38	0	0	1	0.19	1	0.19	1	0.17	0	0	1	0.22	0	0	0	0	1	0.22
Potri.006G037600.1	0.66	0.12	4	0.86	25	4.82	0	0	2	0.39	25	4.73	0	0	0	0	8	1.79	0	0	1	0.18	0	0
Potri.006G057200.1	12.84	1.51	0	0	0	0	0	0	12.87	1.67	0	0	0	0	0	0	0	0	7.06	0.83	0	0	8.54	1.25
Potri.006G057600.1	4.59	0.54	7.72	1.1	0	0	9.72	1.11	25.17	3.26	2.45	0.3	24.93	2.76	10.92	1.34	0	0	4.15	0.49	8.06	0.98	2.43	0.35
Potri.006G074600.1	12	2.17	15	3.29	27	5.28	2	0.35	14	2.79	38	7.29	3	0.51	7	1.32	38	8.63	3	0.54	4	0.75	41	9.11
Potri.006G074700.1	25	4.5	99	21.6	59	11.48	23	4.02	93	18.42	55	10.5	17	2.9	89	16.64	6	1.36	57	10.27	54	10.06	7	1.55
Potri.006G074800.1	1	0.18	2	0.43	0	0	6	1.04	2	0.39	1	0.19	7	1.18	7	1.3	0	0	10	1.78	4	0.74	0	0
Potri.006G074900.1	20.17	3.63	35.21	7.68	115.42	22.45	16.36	2.86	24.57	4.87	120.01	22.91	23.33	3.98	82.63	15.45	52.92	11.95	26.33	4.74	105.37	19.64	71	15.7
Potri.006G102600.1	0	0	0	0	0	0	0	0	0	0	0	0	0	0	0	0	7	2.66	0	0	0	0	6	2.23
Potri.006G135600.1	67.5	5.26	179.5	17.06	156.5	13.15	65.5	4.99	177.5	15.27	153	12.65	44	3.23	188.5	15.33	73.5	7.25	55.5	4.34	185	14.98	101	9.79
Potri.006G148800.1	1	0.1	0	0	11	1.23	2	0.2	0	0	11	1.21	3	0.29	0	0	86	11.29	0	0	2	0.22	108	13.92
Potri.006G186600.1	61	5.48	174	19.08	820	79.55	53	4.66	272	26.99	918	87.64	55	4.67	529	49.62	505	57.47	79	7.13	612	57.19	422	47.17
Potri.006G202100.1	135	11.73	2	0.21	33	3.09	151	12.82	9	0.86	13	1.2	143	11.72	3	0.27	64	7.04	183	15.97	2	0.18	70	7.56
Potri.007G009400.1	0	0	20	2.75	150	18.29	1	0.11	17	2.12	148	17.75	1	0.11	19	2.24	9	1.28	0	0	15	1.76	7	0.98
Potri.007G010500.1	17	3.38	14	3.37	16	3.44	22	4.24	16	3.5	25	5.27	20	3.77	12	2.48	8	1.99	17	3.38	8	1.65	7	1.71
Potri.007G020200.1	12	1.27	1	0.13	191	21.85	8	0.83	10	1.17	132	14.86	5	0.5	1	0.11	23	3.08	3	0.32	0	0	13	1.71
Potri.007G023600.1	643	68.17	47	6.07	6	0.69	475	49.16	99	11.58	12	1.35	27	2.7	13	1.44	22	2.95	12	1.28	10	1.1	30	3.95
Potri.007G044600.1	0	0	0	0	0	0	0	0	2	0.41	0	0	0	0	0	0	2	0.47	0	0	0	0	2	0.46
Potri.007G097600.1	0	0	2	0.34	89	13.47	0	0	9	1.39	108	16.06	0	0	0	0	4	0.71	0	0	0	0	4	0.69
Potri.007G108000.1	0	0	0	0	0	0	0	0	0	0	0	0	0	0	0	0	1.66	0.45	0	0	0	0	0	0
Potri.008G052000.1	0	0	0	0	0	0	0	0	0	0	0	0	0	0	0	0	0	0	0	0	0	0	0	0
Potri.008G070800.1	101	17.24	449	92.92	19	3.5	81	13.43	281	52.77	11	1.99	26	4.2	61	10.82	0	0	20	3.42	44	7.78	0	0
Potri.008G112000.1	8.23	1.41	5.87	1.22	0	0	48.16	8.02	9.4	1.77	28.1	5.11	0	0	45.23	8.06	51.96	11.19	35.32	6.06	12.02	2.13	32.47	6.85
Potri.008G113200.1	75.22	5.18	0	0	36.34	2.7	100.58	6.78	85.22	6.48	76	5.56	80.02	5.19	39.41	2.83	12	1.05	46.62	3.23	23.49	1.68	0	0
Potri.008G116000.1	26	3.08	9	1.3	58	7.42	22	2.54	35	4.57	60	7.55	20	2.24	5	0.62	4	0.6	19	2.26	2	0.25	1	0.15
Potri.008G161800.1	6.63	0.94	16.68	2.89	51	7.84	45.79	6.35	10.02	1.57	28.65	4.33	54.79	7.38	51.48	7.63	80.59	14.45	35.84	5.12	47.87	7.07	78.36	13.77
Potri.008G165700.1	52	15.84	58	21.21	35	11.54	61	17.87	84	28	67	21.59	84	24.32	221	69.47	64	24.15	74	22.43	236	74.01	40	14.72
Potri.008G189600.1	4	0.39	3	0.35	2	0.21	1	0.09	6	0.64	1	0.1	1	0.09	2	0.2	0	0	1	0.1	0	0	2	0.24
Potri.008G190800.1	2	0.33	2	0.4	9	1.59	2	0.32	3	0.54	4	0.69	8	1.24	7	1.19	26	5.35	3	0.49	3	0.51	24	4.84
Potri.008G202900.1	0	0	0	0	0	0	0	0	0	0	0	0	0	0	0	0	0	0	0	0	0	0	0	0
Potri.009G005600.1	0	0	0	0	0	0	2.99	0.4	0	0	0	0	0.5	0.06	0	0	0	0	1	0.14	0	0	0	0
Potri.009G023800.1	0	0	0	0	2	0.41	0	0	2	0.42	3	0.6	0	0	0	0	0	0	0	0	0	0	5	1.16
Potri.009G064700.1	87.99	8.5	83	9.78	123.67	12.9	98.15	9.27	70.33	7.5	115.33	11.83	78.33	7.15	46.67	4.7	284.67	34.8	67	6.5	47.67	4.79	332.67	39.93
Potri.009G081400.1	11	1.37	85	12.89	141	18.98	11	1.34	72	9.9	101	13.37	34	4.01	215	27.92	53	8.34	42	5.25	174	22.52	45	6.94
Potri.009G089000.1	0	0	0	0	1	0.13	0	0	0	0	0	0	0	0	0	0	2	0.3	0	0	0	0	0	0
Potri.009G094300.1	0	0	0	0	1	0.18	0	0	0	0	3	0.52	0	0	0	0	0	0	0	0	0	0	0	0
Potri.009G117300.1	550.18	50.6	178.29	19.99	23.88	2.37	472.96	42.51	169.68	17.22	0	0	34.04	2.95	139.94	13.43	14.4	1.68	42.97	3.97	97.27	9.3	0	0
Potri.009G129600.1	67	8.78	41.5	6.61	30	4.24	62.5	7.98	40.5	5.85	31	4.31	68.5	8.48	44.5	6.07	19.5	3.22	50	6.57	48.5	6.59	24.5	3.97
Potri.009G136300.1	0	0	0	0	0	0	0	0	0	0	0	0	0	0	0	0	0	0	0	0	0	0	0	0
Potri.010G040000.1	104	19.41	70	15.82	47	9.47	72.81	13.18	68.34	14.02	35	6.92	77.82	13.75	50	9.68	0	0	75	14	46	8.88	7.18	1.64
Potri.010G041500.1	0	0	0	0	0	0	0	0	0	0	0	0	0	0	0	0	0	0	0	0	0	0	0	0
Potri.010G072900.1	128.44	26.73	182.17	45.83	150.11	33.76	126.36	25.47	228.84	52.31	197.12	43.46	234.8	46.29	468.33	101.05	129.96	33.83	164.48	34.2	410.64	88.34	124.83	31.78
Potri.010G077000.1	2	0.42	1.67	0.42	89.67	20.4	1.33	0.27	11.67	2.7	97.67	21.78	0.67	0.13	13.33	2.91	263	69.24	0.67	0.14	14.67	3.19	320	82.39
Potri.010G098900.1	4	0.37	5	0.57	382	38.6	9	0.82	9	0.93	271	26.94	6	0.53	0	0	18	2.13	6	0.56	3	0.29	2	0.23
Potri.010G130000.1	43	4.98	20	2.82	84	10.51	64	7.23	24	3.07	75	9.22	29	3.17	3	0.36	6	0.88	31	3.6	6	0.72	8	1.15
Potri.010G136100.1	303.94	21.33	343.89	29.47	259	19.6	305.89	21.01	380	29.45	301	22.43	251.98	16.67	227.9	16.7	44	3.92	239	16.86	266	19.41	30.97	2.71
Potri.010G137600.1	210	27.62	234	37.42	128	18.17	222	28.45	250	36.23	160	22.33	225	27.96	183	25.06	30	4.97	205	27.03	197	26.88	21	3.41
Potri.010G186700.1	124.17	21.2	421.01	87.13	11	2.03	159	26.37	338	63.47	11	1.99	337	54.43	178	31.57	7	1.5	276	47.15	131.1	23.17	8	1.68
Potri.010G208600.1	0	0	16	4.4	0	0	3	0.66	3	0.75	0	0	0	0	0	0	0	0	1	0.23	0	0	0	0
Potri.011G031000.1	254	46.91	329	73.58	244	48.68	270.57	48.49	368	74.72	319	62.45	124	21.68	361	69.21	68	15.74	125	23.09	366.19	69.98	42	9.52
Potri.011G033000.1	114.08	9.46	131.55	13.31	95.34	8.53	179.89	14.58	128.34	11.75	114.61	10.09	103.86	8.12	146.31	12.66	53.25	5.59	37.34	3.11	177.35	15.28	27.08	2.79
Potri.011G053400.1	0	0	0	0	0	0	0	0	0	0	0	0	0	0	0	0	0	0	0	0	0	0	0	0
Potri.011G065500.1	0	0	0	0	3	0.66	0	0	1	0.22	8	1.73	0	0	0	0	4	1.02	0	0	2	0.42	3	0.75
Potri.011G080000.1	175	33	158	36.07	171	34.83	151	27.62	176	36.48	167	33.37	128	22.85	170	33.27	42	9.92	141	26.58	120	23.41	28	6.48
Potri.011G129500.1	3.04	0.27	6.62	0.72	13.58	1.31	5.35	0.47	0	0	29.71	2.82	2.52	0.21	4.28	0.4	19.05	2.15	0	0	3.7	0.34	12.43	1.38
Potri.011G132400.1	379	67.91	362	78.58	490	94.84	362	62.97	344	67.78	468	88.9	400	67.83	415	77.22	170	38.21	368	65.97	312	57.87	132	29.05
Potri.011G157700.1	0	0	0	0	0	0	0	0	0	0	0	0	0	0	0	0	0	0	0	0	0	0	2	0.36
Potri.012G031800.1	0	0	0	0	0	0	0	0	0	0	0	0	0	0	0	0	1	0.17	0	0	0	0	3	0.49
Potri.012G055700.1	30.95	4.96	105.44	20.48	2	0.35	26.39	4.11	102.17	18	0	0	0	0	3.5	0.58	0	0	0	0	10	1.66	0	0
Potri.012G065000.1	503	32.86	405	32.33	534.68	37.68	459	29.36	443	31.98	496	34.42	606	37.33	849	57.94	116	9.62	543	35.67	753	51.19	106	8.64
Potri.012G069500.1	0	0	0	0	3	2.65	0	0	0	0	4	3.38	0	0	0	0	0	0	0	0	0	0	0	0
Potri.012G072700.1	110.77	17.81	60.62	11.83	71.76	12.46	110.41	17.26	74.73	13.23	66.38	11.32	69.85	10.63	46	7.69	12	2.43	69.37	11.17	31.82	5.3	17	3.37
Potri.012G079100.1	5	1.37	1	0.33	0	0	13	3.44	12	3.61	0	0	2	0.52	0	0	3	1.02	13	3.56	1	0.28	3	1
Potri.012G104900.1	215	24.92	45	6.35	1	0.13	218	24.64	52	6.64	4	0.49	53	5.8	45	5.43	7	1.02	22	2.56	49	5.89	6	0.86
Potri.012G106000.1	574	41.57	278.73	24.65	124	9.69	528	37.42	349	27.91	135.79	10.44	609.82	41.65	382	28.88	68	6.24	569.73	41.47	419	31.56	54	4.87
Potri.012G132000.1	0	0	0	0	114	23.1	0	0	2	0.41	116	23.06	0	0	0	0	74	17.4	0	0	0	0	78	17.95
Potri.012G132100.1	1	0.13	0	0	125	17.75	0	0	3	0.43	114	15.91	0	0	0	0	30	4.97	0	0	1	0.14	18	2.93
Potri.013G001300.1	0	0	0	0	0	0	15.28	0.81	0	0	0	0	0	0	0	0	0	0	0	0	0	0	0	0
Potri.013G025900.1	21	2.57	25.41	3.78	24	3.17	19	2.26	96	12.93	24	3.11	0	0	0	0	5	0.77	0	0	0	0	0	0
Potri.013G041000.1	0	0	0	0	0	0	0	0	0	0	4.26	0.52	0	0	0	0	0	0	0	0	0	0	0	0
Potri.013G107500.1	72	12.01	26	5.26	61	10.99	52	8.43	28	5.14	67	11.85	58	9.15	30	5.2	41	8.59	36	6.01	33	5.7	39	8
Potri.013G117600.1	3	0.49	30	5.96	2	0.35	4	0.64	38	6.85	5	0.87	3	0.46	24	4.08	0	0	6	0.98	33	5.6	0	0
Potri.013G126800.1	7.5	2.83	45.38	20.48	48	19.65	6.98	2.52	31.5	12.99	57.02	22.76	12	4.32	44	17.09	13.87	6.45	11	4.12	41.44	16.07	14	6.33
Potri.013G129800.1	1	0.21	15	3.84	17	3.89	0	0	23	5.35	10	2.24	0	0	16	3.51	205	54.28	0	0	16	3.5	194	50.23
Potri.014G017100.1	0	0	0	0	1	0.13	0	0	1	0.13	0	0	0	0	0	0	2	0.31	0	0	0	0	1	0.15
Potri.014G025800.1	18	2.48	14	2.34	55.16	8.19	0	0	41.47	6.28	34.66	5.06	35.18	4.57	48.9	7	25.49	4.42	22.32	3.08	58.37	8.33	14.4	2.45
Potri.014G025900.1	0	0	0	0	0	0	0	0	0	0	0	0	0	0	0	0	4	0.75	0	0	0	0	2	0.37
Potri.014G027300.1	1	0.17	0	0	0	0	1	0.16	0	0	1	0.18	0	0	0	0	0	0	0	0	0	0	0	0
Potri.014G066500.1	911.28	77.68	180	18.72	40	3.68	1071.02	89.26	224	21.08	15	1.36	1095.74	88.13	238	21.17	0	0	961.65	82.35	232	20.56	0	0
Potri.014G099700.1	420	26.53	385	29.71	641	43.67	449	27.77	488	34.06	707	47.44	462	27.51	744	49.09	203.29	16.3	434	27.57	795	52.25	141.77	11.17
Potri.014G103700.1	61.5	4.98	10.5	1.04	6	0.52	89.94	7.13	41.39	3.7	8.5	0.73	6	0.46	9	0.76	6	0.62	6.5	0.53	2	0.17	7.5	0.76
Potri.014G106300.1	68.7	7.24	1.93	0.25	4	0.45	67	6.89	49	5.7	0	0	192	19.11	0	0	0	0	193.85	20.51	6.88	0.75	0	0
Potri.014G111400.1	462.86	32.54	9.59	0.82	46.77	3.55	475.37	32.71	40.79	3.17	61	4.55	231.32	15.34	25	1.84	29	2.59	145.79	10.3	26.89	1.97	27	2.37
Potri.014G148900.1	0	0	9.03	0.76	0	0	8.06	0.54	16.4	1.25	0	0	0	0	28.72	2.06	5.21	0.45	0	0	7.84	0.56	0	0
Potri.014G150600.1	417	51.12	374	55.78	316	41.81	429	51.27	335	45.27	308	40.07	476	55.12	304	38.81	210	32.48	394	48.44	339	43.13	177	26.85
Potri.015G022300.1	0	0	0	0	0	0	0	0	1	0.16	0	0	0	0	0	0	0	0	0	0	0	0	0	0
Potri.015G046300.1	0	0	0	0	12	2.07	1	0.15	5	0.88	7	1.18	2	0.3	1	0.17	9	1.8	0	0	4	0.66	4	0.79
Potri.015G048000.1	0	0	0	0	275.54	20.65	0	0	95.38	7.32	0	0	0	0	53.15	3.86	28.61	2.52	0	0	131.01	9.47	0	0
Potri.015G063300.1	0	0	0	0	1	0.88	0	0	0	0	1	0.85	0	0	0	0	0	0	0	0	0	0	0	0
Potri.015G068100.1	138.09	22.01	113.23	21.9	120	20.66	166.58	25.82	137.08	24.05	76	12.85	129.97	19.59	118.88	19.7	21.06	4.22	105.34	16.81	98.75	16.31	10	1.96
Potri.015G074500.1	8	2.21	4	1.33	6.01	1.8	9	2.4	8	2.42	4	1.17	55	14.45	85	24.3	363	124.76	116	31.97	58	16.54	408	136.84
Potri.015G104200.1	45.33	5.29	13	1.85	0	0	67.44	7.67	25	3.22	0	0	47.6	5.24	6	0.73	0	0	43.36	5.07	5	0.61	0	0
Potri.015G105200.1	303.72	21.48	163.27	14.1	134	10.22	278	19.24	216.28	16.89	169.21	12.71	181.24	12.09	111	8.2	33.22	2.98	229.8	16.34	140.95	10.37	88.84	7.83
Potri.015G134300.1	2	0.36	13	2.86	157	30.85	7	1.24	33.01	6.6	115	22.17	5	0.86	17	3.21	38	8.67	0	0	16	3.01	59	13.18
Potri.015G134400.1	0	0	1	0.22	1	0.2	0	0	3	0.6	2	0.38	0	0	2	0.38	3	0.68	0	0	10	1.87	0	0
Potri.015G142700.1	142	26.5	208	46.99	70	14.11	131	23.72	337	69.13	92	18.2	184	32.5	411	79.61	337	78.82	175	32.66	477	92.1	361	82.64
Potri.016G035400.1	15	2.8	35	7.91	36.02	7.26	24	4.34	30	6.15	41	8.11	14	2.47	54	10.46	30	7.02	12	2.24	35	6.76	45	10.3
Potri.016G037300.1	0	0	0	0	5.25	0.94	0	0	0	0	6	1.06	1	0.16	0	0	0	0	0	0	0	0	4	0.82
Potri.016G050500.1	78	9.28	138	19.98	55	7.06	86	9.98	107	14.03	72	9.09	127	14.27	152	18.83	56	8.41	145	17.3	138	17.04	77	11.34
Potri.016G051100.1	411	49.38	57	8.33	15	1.95	355	41.59	95	12.58	22	2.8	115	13.05	47	5.88	20	3.03	123	14.82	39	4.86	9	1.34
Potri.016G068500.1	19	1.64	0	0	3	0.28	22	1.85	0	0	12	1.1	21	1.71	0	0	33	3.6	15	1.3	0	0	41	4.39
Potri.016G120800.1	0	0	4	1.5	0	0	0	0	1	0.34	0	0	0	0	0	0	0	0	0	0	0	0	1	0.38
Potri.017G041000.1	0	0	1	0.16	0	0	0	0	1	0.15	1	0.14	3	0.38	1	0.14	44	7.48	8	1.08	2	0.28	64	10.67
Potri.017G054500.1	108	10.44	0	0	0	0	79	7.46	1	0.11	0	0	70	6.39	0	0	2	0.24	69	6.7	0	0	2	0.24
Potri.017G081300.1	20	16.56	2	1.93	2	1.8	23	17.69	3	2.66	0	0	1	0.8	0	0	1	0.98	0	0	0	0	0	0
Potri.017G101700.1	35.95	4.56	11	1.7	9.43	1.29	42.36	5.24	6.6	0.92	22.5	3.03	55.98	6.71	15	1.98	14.11	2.26	58.1	7.39	0	0	7.17	1.12
Potri.017G115300.1	322	53.45	1100	221.44	9	1.61	229	36.94	666	121.64	20	3.52	46	7.22	202	34.84	10	2.09	50	8.31	257	44.18	14	2.86
Potri.017G126800.1	0	0	0	0	43	5.93	0	0	0	0	33	4.47	0	0	0	0	16	2.58	0	0	0	0	7	1.11
Potri.018G083700.1	384.97	45.95	976.27	141.78	850.32	109.54	362.75	42.22	864.47	113.74	881.94	111.7	350.87	39.55	328.03	40.78	127	19.13	308	36.87	391.85	48.54	111	16.4
Potri.018G109500.1	113.39	10.05	575.89	62.22	1366.43	130.6	173	14.98	598.74	58.55	1443.5	135.78	396	33.1	690.35	63.81	655.86	73.55	384.67	34.23	653.21	60.14	432.84	47.67
Potri.018G141500.1	8	1.28	26.24	5.08	4	0.69	6	0.93	39	6.84	3	0.51	9	1.36	78.08	12.94	21.01	4.21	18	2.87	45.05	7.44	25	4.91
Potri.018G141600.1	0	0	2.76	0.71	0	0	0	0	3	0.71	0	0	0	0	18.92	4.2	3.99	1.07	1	0.21	21.95	4.86	11	2.88
Potri.018G141700.1	53	9.59	59.58	13.06	3	0.59	68	11.95	42	8.36	4	0.77	190	32.54	72	13.53	0	0	451.64	81.77	37	6.93	10.86	2.41
Potri.018G141800.1	155.99	27.95	246.55	53.52	109.35	21.17	107.72	18.74	339.61	66.92	76.86	14.6	222.22	37.68	414.53	77.13	113.93	25.61	201.88	36.19	478.84	88.81	149	32.79
Potri.019G034700.1	1	0.19	0	0	0	0	0	0	0	0	0	0	3	0.53	1	0.19	2	0.47	2	0.37	0	0	1	0.23
Potri.019G079900.1	0	0	0	0	0	0	0	0	0	0	0	0	0	0	0	0	0	0	0	0	0	0	0	0
Potri.019G089000.1	657	108.07	245	48.88	70	12.44	610	97.51	194	35.11	92	16.05	389	60.53	171	29.23	145	29.96	300	49.4	167	28.45	111	22.47
Potri.019G089300.1	0	0	0	0	0	0	0	0	0	0	0	0	0	0	0	0	0	0	0	0	0	0	0	0
Potri.019G099300.1	3.71	0.8	10.93	2.83	3.76	0.87	0.93	0.19	2.01	0.47	2.84	0.65	4.93	1	22.14	4.92	164.63	44.1	0	0	34.1	7.55	209.82	54.96
Potri.019G099400.1	0	0	0	0	0	0	0	0	0	0	0	0	0	0	0	0	0	0	0	0	0	0	0.89	0.23
Potri.019G099500.1	6.29	1.23	9.07	2.15	6.24	1.32	3.07	0.58	1.99	0.43	1.16	0.24	17.07	3.16	62.86	12.76	507.37	124.34	1	0.2	45.9	9.29	462.29	110.86
Potri.019G112000.1	8	3.02	45	20.31	46	18.83	7	2.53	57	23.5	43	17.16	22	7.92	77	29.91	28	13.01	26	9.74	68	26.36	34	15.37
Potri.T107900.1	0	0	0	0	0	0	0	0	0	0	0	0	0	0	0	0	0.34	0.1	0	0	0	0	1	0.29
Potri.T155900.1	0	0	0	0	760	112	0.02	0	11.71	1.76	666	96.44	0.5	0.06	0	0	327	56.23	1	0.14	0	0	235	39.62
Potri.T179100.1	0	0	0	0	0	0	0	0	0	0	0	0	0	0	0	0	0	0	0	0	0	0	0	0
