# Supplementary material for: Characterization of the basic helix–loop–helix gene family and its tissue-differential expression in response to salt stress in poplar
Source: PeerJ journal article supplement (doi:10.7717/peerj.4502), 2018-03-14

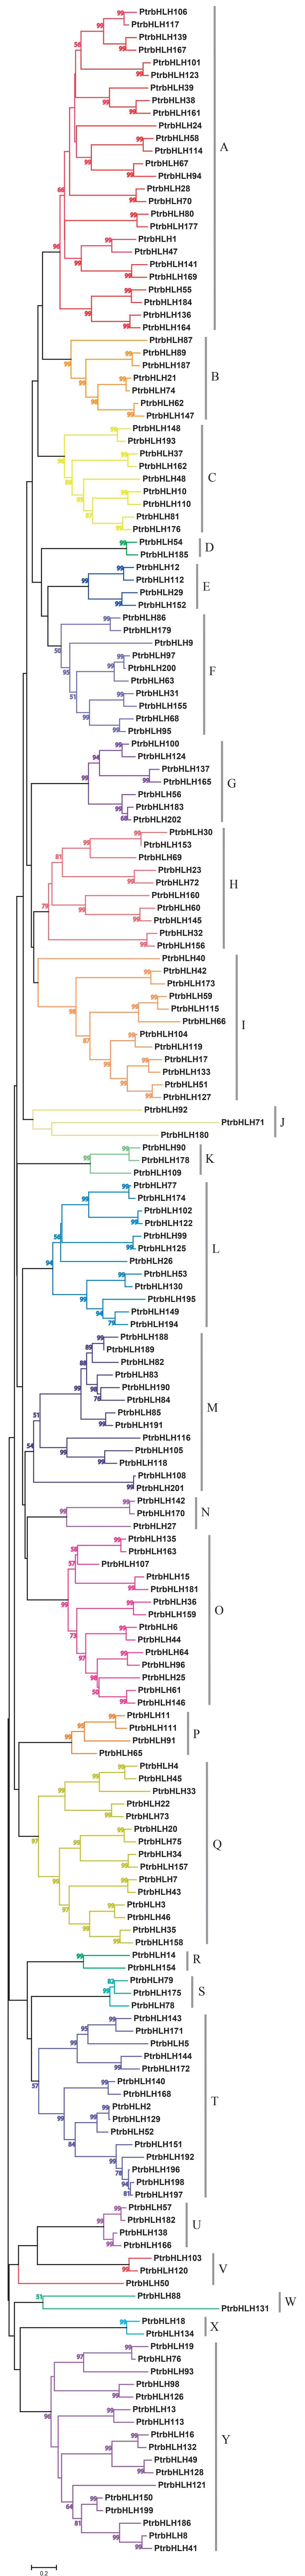

Supplement: Supplemental_Figure_S1.pdf [file Supplemental_Figure_S1.pdf]
