# Supplementary material for: Characterization of the basic helix–loop–helix gene family and its tissue-differential expression in response to salt stress in poplar
Source: PeerJ journal article supplement (doi:10.7717/peerj.4502), 2018-03-14

**L(C)-R(C)**

**L(C)-S(C)**

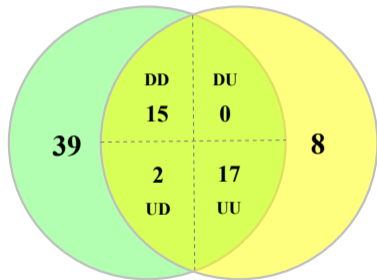

**R(C)-L(C)**

**R(C)-S(C)**

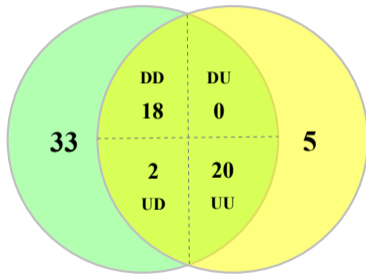

**S(C)-L(C)**

**S(C)-R(C)**

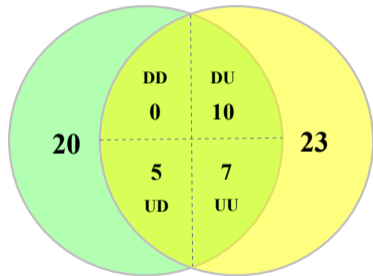

Supplement: Supplemental_Figure_S4.pdf [file Supplemental_Figure_S4.pdf]
